# Supplementary material for: Chiral conversion and periodical decay in bridged-azobenzene photoisomerization: an ab initio on-the-fly nonadiabatic dynamics simulation
Source: Royal Society of Chemistry journal article supplement (doi:10.1039/c6ra03788g), 2016-01-01
Supplement: c6ra03788g1.pdf [file c6ra03788g1.pdf]

Supplementary information

**Chiral conversion and periodical decay in bridged-  
azobenzene photoisomerization: an ab initio on-the-fly  
nonadiabatic dynamics simulation**

Wanqing Gao<sup>a</sup>, Le Yu<sup>b,c\*</sup>, Xiaolei Zheng<sup>b</sup>, Yibo Lei<sup>b</sup>, Chaoyuan Zhu<sup>c</sup>, Huixian Han<sup>a\*1</sup>

<sup>a</sup>*School of Physics, Northwest University, Xi'an, Shaanxi, 710069, P. R. China*

<sup>b</sup>*Key Laboratory of Synthetic and Natural Functional Molecule Chemistry of Ministry of Education, College of Chemistry & Materials Science, Shaanxi Key Laboratory of Physico-Inorganic Chemistry, Northwest University, Xi'an, Shaanxi, 710127, P. R. China*

<sup>c</sup>*Institute of Molecular Science, Department of Applied Chemistry, and Center for Interdisciplinary Molecular Science, National Chiao-Tung University, Hsinchu 300, Taiwan*

---

\*E-mails: Le Yu [yule@iccas.ac.cn](mailto:yule@iccas.ac.cn) and Huixian Han [hxhan@nwu.edu.cn](mailto:hxhan@nwu.edu.cn).

**Figure S1.** Time evolution of potential energies of the  $S_1$  and  $S_0$  states and important angles involve in the photoisomerization for (a) trans to trans (nonreactive), (b) cis to cis (counterclockwise nonreactive), (c) cis to cis (clockwise nonreactive)

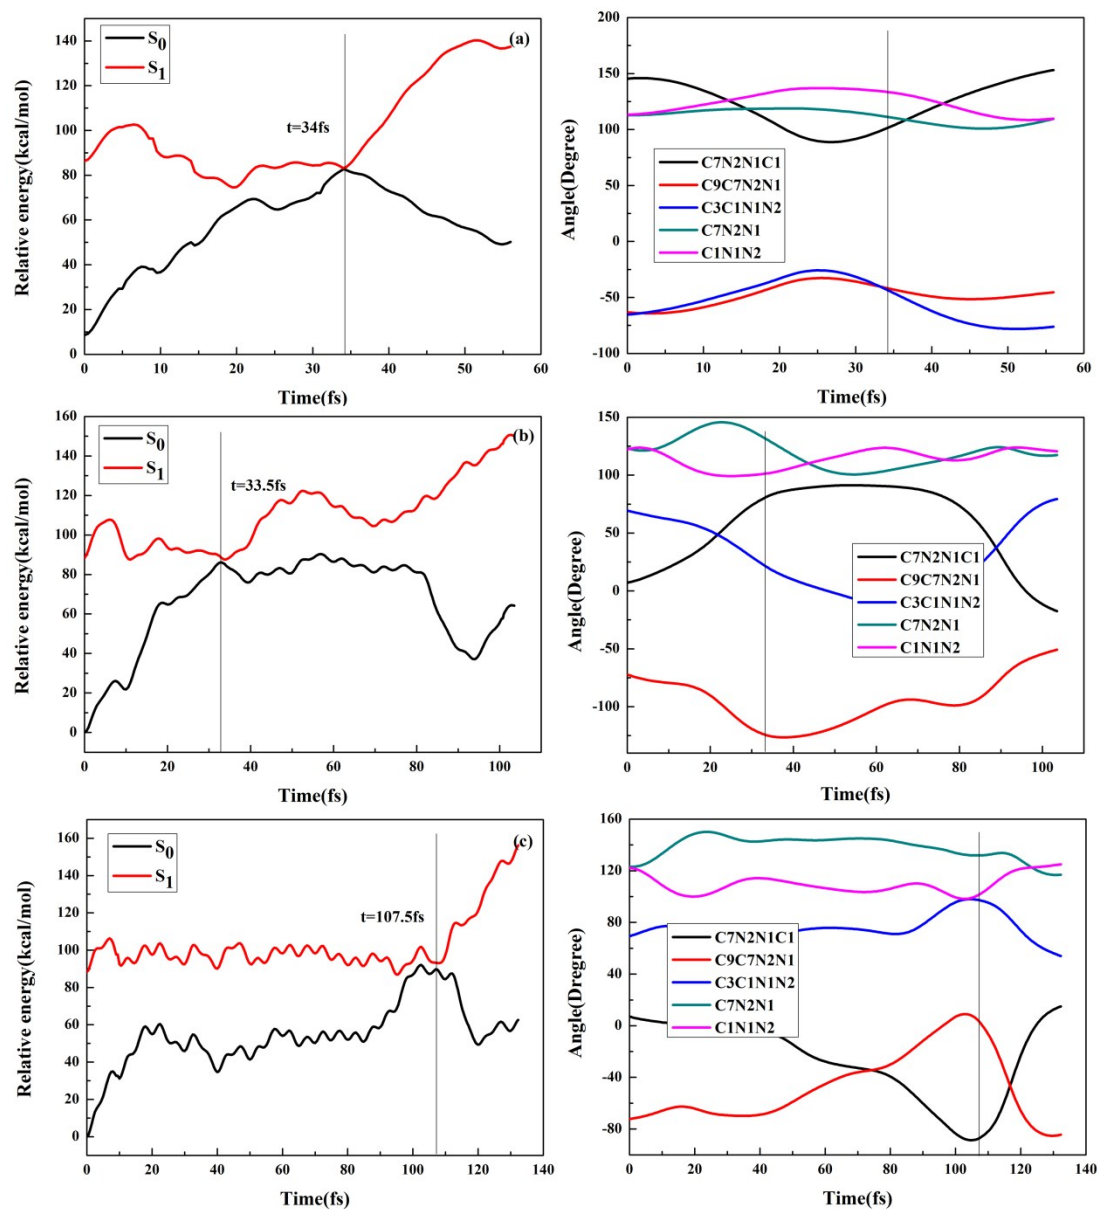

**Table S1.** Relative energies (kcal/mol) for the critical structures in the S<sub>0</sub> and S<sub>1</sub> states.

|                                          | (6e,5o)/6-31G <sup>a</sup>           |          |                                        |           | (10e,8o)/6-31G <sup>a</sup>             |           |                           |           |
|------------------------------------------|--------------------------------------|----------|----------------------------------------|-----------|-----------------------------------------|-----------|---------------------------|-----------|
|                                          | cis                                  | trans    | CI-cis                                 | CI-trans  | cis                                     | trans     | CI-cis                    | CI-trans  |
| CASSCF (S <sub>0</sub> /S <sub>1</sub> ) | 0/88.3                               | 8.6/86.3 | 48.9/49.0                              | 46.9/47.1 | 0/71.9                                  | 16.4/74.6 | 56.3/56.8                 | 42.4/42.4 |
| CASPT2 (S <sub>0</sub> /S <sub>1</sub> ) | 0/81.9                               | 9.5/74.6 | 48.3/50.6                              | 45.2/46.9 | 0/69.1                                  | 10.7/65.7 | 47.5/52.1                 | 39.0/43.2 |
| ICMRCI (S <sub>0</sub> /S <sub>1</sub> ) | 0/87.4                               | 8.8/83.5 | 49.9/50.8                              | 48.8/49.6 | 0/72.8                                  | 14.6/73.5 | 53.2/56.9                 | 45.5/50.6 |
|                                          | CASSCF<br>(6e,5o)/6-31G <sup>c</sup> |          | CASSCF<br>(10e,8o)/6-31G <sup>*c</sup> |           | CASSCF<br>(14e,12o)/6-31G <sup>*c</sup> |           | Expt <sup>d</sup>         |           |
|                                          | cis                                  | trans    | cis                                    | trans     | cis                                     | trans     | cis                       | trans     |
| S <sub>0</sub> Energy                    | 0                                    | 8.8      | 0                                      | 7.1       | 0                                       | 7.1       |                           |           |
| VEE <sup>b</sup>                         | 88.2                                 | 77.7     | 80.6                                   | 69.2      | 80.3                                    | 68.7      | 70.8                      | 58.4      |
|                                          | CASPT2(14e,12o)/app-TZ <sup>e</sup>  |          |                                        |           | DFTB/6-31G <sup>*f</sup>                |           | B3LYP/6-31G <sup>*f</sup> |           |
|                                          | cis                                  | trans    | CI-trans                               | CI-cis    | cis                                     | trans     | cis                       | trans     |
| S <sub>0</sub> Energy                    | 0                                    | 10.5     | 41.4                                   | 56.3      | 0                                       | 10.2      | 0                         | 6.7       |
| VEE <sup>b</sup>                         |                                      |          | 2.3                                    | 9.5       | 62.7                                    | 50.7      | 67.3                      | 55.5      |

<sup>a</sup> This work<sup>b</sup> Vertical Excitation Energies<sup>c</sup> Ref.27.<sup>d</sup> Ref.19.<sup>e</sup> Ref.22.<sup>f</sup> Ref.23.

**Table S2.** Cartesian coordinates for all optimized geometries**cis-b-Ab (S<sub>0</sub>) CASSCF(6,5)**

|   |            |             |             |
|---|------------|-------------|-------------|
| N | 1.70768642 | 1.06604894  | 0.31455858  |
| N | 1.68094222 | -0.13012873 | 0.72264833  |
| C | 2.90555618 | 1.66980959  | -0.21554228 |
| C | 3.44932023 | 2.75300898  | 0.45323068  |
| C | 3.40359467 | 1.24419744  | -1.44178315 |
| C | 4.54545962 | 3.40763244  | -0.08488377 |
| C | 4.49137332 | 1.92622472  | -1.97658546 |
| C | 5.06605060 | 2.99340858  | -1.30290673 |
| C | 2.86519140 | -0.95657843 | 0.83904662  |
| C | 3.17293083 | -1.27680650 | 2.17913109  |
| C | 3.58232086 | -1.49976623 | -0.20257170 |
| C | 4.22583456 | -2.11011330 | 2.47730054  |
| C | 4.65380828 | -2.36368480 | 0.13173104  |
| C | 4.97764431 | -2.66410096 | 1.42505345  |
| C | 2.76128820 | 0.07174073  | -2.14359044 |
| C | 3.30748423 | -1.29885117 | -1.68403170 |
| H | 4.24072921 | -1.47828725 | -2.20519585 |
| H | 2.61837707 | -2.06911905 | -2.02190177 |
| H | 3.01120695 | 3.07848097  | 1.37649948  |
| H | 4.97935289 | 4.24008851  | 0.43375332  |
| H | 4.88727420 | 1.62059325  | -2.92699752 |
| H | 5.90656442 | 3.50505437  | -1.73032500 |
| H | 2.55713306 | -0.86343779 | 2.95365662  |
| H | 4.46123559 | -2.34506612 | 3.49683538  |
| H | 5.22797172 | -2.79113012 | -0.66853569 |
| H | 5.79808633 | -3.32199267 | 1.63708762  |
| H | 2.92958622 | 0.15313421  | -3.21109940 |
| H | 1.68851863 | 0.10674450  | -2.00296024 |

**trans-b-Ab (S<sub>0</sub>) CASSCF(6,5)**

|   |            |             |             |
|---|------------|-------------|-------------|
| N | 4.04581619 | 0.99454513  | 0.85536375  |
| N | 3.00596469 | 0.27527027  | 0.98788228  |
| C | 3.89362101 | 2.03353898  | -0.10969256 |
| C | 4.04924062 | 3.36143806  | 0.15571479  |
| C | 3.72021019 | 1.53349541  | -1.42803058 |
| C | 3.99487010 | 4.28453225  | -0.90292331 |
| C | 3.69083640 | 2.46376377  | -2.45226468 |
| C | 3.81958180 | 3.84172499  | -2.18728304 |
| C | 3.31102697 | -1.09171719 | 1.26129637  |
| C | 2.84013165 | -1.77041731 | 2.36606537  |
| C | 4.00512369 | -1.72873349 | 0.22568430  |
| C | 3.09819270 | -3.12873101 | 2.48726901  |
| C | 4.23312577 | -3.09287368 | 0.36468342  |
| C | 3.79434247 | -3.78676719 | 1.48593119  |
| C | 3.54501750 | 0.03673009  | -1.71736826 |
| C | 4.51078147 | -0.98040281 | -1.01497880 |
| H | 5.44186944 | -0.48126655 | -0.77358037 |
| H | 4.75836662 | -1.73782632 | -1.74959093 |
| H | 4.21023899 | 3.69353784  | 1.16263490  |
| H | 4.10008807 | 5.33196763  | -0.69724385 |
| H | 3.56580739 | 2.13380482  | -3.46647546 |
| H | 3.78727089 | 4.54010473  | -3.00114748 |

|   |            |             |             |
|---|------------|-------------|-------------|
| H | 2.28492000 | -1.24403684 | 3.11754454  |
| H | 2.75121657 | -3.66547458 | 3.34855119  |
| H | 4.75780130 | -3.62046350 | -0.40950373 |
| H | 3.98764235 | -4.83888763 | 1.56859511  |
| H | 3.68013152 | -0.08668877 | -2.78565446 |
| H | 2.51966835 | -0.24539353 | -1.50951202 |

**cis-b-Ab (S<sub>0</sub>) CASSCF(10,8)**

|   |            |             |             |
|---|------------|-------------|-------------|
| N | 1.69130169 | 1.04544942  | 0.29764037  |
| N | 1.65602058 | -0.15141604 | 0.70336552  |
| C | 2.89876315 | 1.64444646  | -0.20929044 |
| C | 3.44108133 | 2.73232161  | 0.47503891  |
| C | 3.41456212 | 1.22435175  | -1.43714105 |
| C | 4.55114412 | 3.38471649  | -0.05124189 |
| C | 4.51997700 | 1.90893502  | -1.95245589 |
| C | 5.08715602 | 2.96506379  | -1.27086192 |
| C | 2.84744361 | -0.96481818 | 0.83930801  |
| C | 3.17119284 | -1.25912999 | 2.15903660  |
| C | 3.57537555 | -1.50756183 | -0.21808825 |
| C | 4.25332331 | -2.06414444 | 2.45770547  |
| C | 4.65948072 | -2.32491429 | 0.11145052  |
| C | 5.00396898 | -2.60102761 | 1.42212593  |
| C | 2.76734963 | 0.06814424  | -2.16123276 |
| C | 3.25455939 | -1.32427324 | -1.69220441 |
| H | 4.15404908 | -1.57103752 | -2.24340204 |
| H | 2.50846769 | -2.05882298 | -1.98474965 |
| H | 2.99303439 | 3.05651193  | 1.39402117  |
| H | 4.98438891 | 4.21441531  | 0.47235578  |
| H | 4.92742421 | 1.60437610  | -2.89849068 |
| H | 5.93632888 | 3.47420578  | -1.68434513 |
| H | 2.55655084 | -0.85494071 | 2.93951107  |
| H | 4.50110105 | -2.27567935 | 3.47939584  |
| H | 5.24255449 | -2.74980802 | -0.68353108 |
| H | 5.84579801 | -3.23186054 | 1.63232951  |
| H | 2.96787854 | 0.14923947  | -3.22313378 |
| H | 1.69224608 | 0.13436143  | -2.05149369 |

**trans-b-Ab (S<sub>0</sub>) CASSCF(10,8)**

|   |            |             |             |
|---|------------|-------------|-------------|
| N | 4.04066505 | 0.99895231  | 0.86223704  |
| N | 3.00261892 | 0.27489227  | 0.98195028  |
| C | 3.89135127 | 2.03229363  | -0.10918299 |
| C | 4.05090714 | 3.36048460  | 0.15482376  |
| C | 3.71663093 | 1.53245949  | -1.42777223 |
| C | 3.99719314 | 4.28352380  | -0.90344767 |
| C | 3.68815230 | 2.46300288  | -2.45198757 |
| C | 3.81924454 | 3.84063969  | -2.18757770 |
| C | 3.30370132 | -1.08912422 | 1.26926945  |
| C | 2.84299232 | -1.76123030 | 2.36255396  |
| C | 4.00466783 | -1.73581733 | 0.21595418  |
| C | 3.10428398 | -3.13655626 | 2.48514701  |
| C | 4.22962488 | -3.09447001 | 0.35450962  |
| C | 3.78678798 | -3.79294742 | 1.49512603  |
| C | 3.54451774 | 0.03595326  | -1.71931449 |
| C | 4.51463592 | -0.97536274 | -1.01522121 |

|   |            |             |             |
|---|------------|-------------|-------------|
| H | 5.43690969 | -0.46692333 | -0.76023161 |
| H | 4.77912306 | -1.72564691 | -1.75127720 |
| H | 4.21366469 | 3.69212601  | 1.16163090  |
| H | 4.10455868 | 5.33080445  | -0.69814276 |
| H | 3.56231575 | 2.13311614  | -3.46611601 |
| H | 3.78709816 | 4.53887495  | -3.00157774 |
| H | 2.28902980 | -1.24056363 | 3.11897224  |
| H | 2.75903672 | -3.66558578 | 3.35198385  |
| H | 4.75173371 | -3.62794262 | -0.41745270 |
| H | 3.98127029 | -4.84488374 | 1.57739787  |
| H | 3.68037623 | -0.08596744 | -2.78764789 |
| H | 2.51981262 | -0.24932815 | -1.51263970 |

**S<sub>0</sub>/S<sub>1</sub> CI-trans-1 CASSCF(6,5)**

|   |              |               |               |
|---|--------------|---------------|---------------|
| N | 3.6877978198 | 1.3719069445  | 1.1635805813  |
| N | 2.9499421974 | 0.2699663863  | 1.3076016791  |
| C | 3.7721185092 | 2.0597423793  | -0.0625354290 |
| C | 4.0756107644 | 3.4127420159  | 0.0766235053  |
| C | 3.5938255775 | 1.5048123853  | -1.3635063927 |
| C | 4.1628027900 | 4.2495454644  | -1.0418832808 |
| C | 3.6869025420 | 2.3510872926  | -2.4399530034 |
| C | 3.9569809677 | 3.7233840403  | -2.2906490323 |
| C | 3.3114085827 | -1.0958519024 | 1.2708386018  |
| C | 2.8259421198 | -1.8798163996 | 2.3119083974  |
| C | 4.0554475857 | -1.6688933782 | 0.2357614732  |
| C | 3.0966559154 | -3.2368765517 | 2.3532040792  |
| C | 4.3161662487 | -3.0336688668 | 0.2962966047  |
| C | 3.8492351736 | -3.8155441938 | 1.3426975260  |
| C | 3.3914207547 | 0.0241306150  | -1.5728088778 |
| C | 4.5196974086 | -0.8421173822 | -0.9380293987 |
| H | 5.3386807688 | -0.1985468435 | -0.6318050323 |
| H | 4.9274750379 | -1.5067505165 | -1.6892662956 |
| H | 4.2230252434 | 3.7939387756  | 1.0670131308  |
| H | 4.3846534483 | 5.2908937069  | -0.9137065736 |
| H | 3.5650616050 | 1.9512997425  | -3.4290689511 |
| H | 4.0153754162 | 4.3470908405  | -3.1620261289 |
| H | 2.2455406902 | -1.4058758309 | 3.0775565294  |
| H | 2.7228965864 | -3.8333251646 | 3.1624467490  |
| H | 4.8811413394 | -3.4904070619 | -0.4944011674 |
| H | 4.0609681163 | -4.8674990132 | 1.3602242924  |
| H | 3.3547150030 | -0.1659265841 | -2.6380833919 |
| H | 2.4313411602 | -0.2846694807 | -1.1760600439 |

**S<sub>0</sub>/S<sub>1</sub> CI-trans-2 CASSCF(6,5)**

|   |              |               |               |
|---|--------------|---------------|---------------|
| N | 4.0800094498 | 1.2441915133  | 1.0463702683  |
| N | 3.2785474614 | 0.3453777282  | 1.6107832516  |
| C | 3.9205901271 | 2.0320004681  | -0.1184569639 |
| C | 4.0528517884 | 3.4057219257  | 0.0475999100  |
| C | 3.7094750216 | 1.4827247171  | -1.3850169547 |
| C | 3.9445168309 | 4.2555035261  | -1.0389440905 |
| C | 3.6056105759 | 2.3553449606  | -2.4638472323 |
| C | 3.7144721123 | 3.7273926143  | -2.3001756213 |
| C | 3.4386211465 | -1.0306305272 | 1.3890785433  |
| C | 2.8348786397 | -1.8262864450 | 2.3630246430  |

|   |              |               |               |
|---|--------------|---------------|---------------|
| C | 4.1248964412 | -1.6451112871 | 0.2997213709  |
| C | 2.9165621826 | -3.2191670645 | 2.3078942549  |
| C | 4.1912093151 | -3.0159046969 | 0.2780313952  |
| C | 3.6012296716 | -3.8100273941 | 1.2765315976  |
| C | 3.6143811930 | -0.0095713982 | -1.5982801881 |
| C | 4.6929005096 | -0.8418445835 | -0.8459216813 |
| H | 5.4845302397 | -0.1893382001 | -0.4984961199 |
| H | 5.1510720896 | -1.5316754364 | -1.5434907407 |
| H | 4.2343440869 | 3.7848994784  | 1.0328297690  |
| H | 4.0410812540 | 5.3145332676  | -0.9016932734 |
| H | 3.4470766215 | 1.9510187197  | -3.4458981066 |
| H | 3.6322350619 | 4.3748682032  | -3.1514330780 |
| H | 2.3166827716 | -1.3315078310 | 3.1595570015  |
| H | 2.4512554427 | -3.8128397328 | 3.0699637295  |
| H | 4.6971893640 | -3.4998730469 | -0.5360747736 |
| H | 3.6819090066 | -4.8780081360 | 1.2165684667  |
| H | 3.6949367608 | -0.2041498629 | -2.6605705695 |
| H | 2.6282821608 | -0.3579747791 | -1.3061308038 |

**S<sub>0</sub>/S<sub>1</sub> CI-trans-3 CASSCF(6,5)**

|   |              |               |               |
|---|--------------|---------------|---------------|
| N | 3.0275114791 | 1.3307200412  | 1.1806120379  |
| N | 3.7771765483 | 0.3116948549  | 1.6413673736  |
| C | 3.4475278352 | 2.0827625069  | 0.0260849189  |
| C | 3.5186040190 | 3.4509725134  | 0.2589957104  |
| C | 3.7032291081 | 1.5637469613  | -1.2450525248 |
| C | 3.8884072157 | 4.3231712207  | -0.7496159937 |
| C | 4.0555967083 | 2.4612650770  | -2.2510896489 |
| C | 4.1591850302 | 3.8225578148  | -2.0130965270 |
| C | 3.6528939915 | -1.0834215741 | 1.3778178662  |
| C | 3.1534137468 | -1.8576066077 | 2.3952832493  |
| C | 4.1013331588 | -1.6741062600 | 0.1739605074  |
| C | 3.0386313379 | -3.2458391779 | 2.2377097154  |
| C | 3.9931564827 | -3.0487275488 | 0.0419063782  |
| C | 3.4607633227 | -3.8380697545 | 1.0757405492  |
| C | 3.5703087758 | 0.0959506230  | -1.5808561432 |
| C | 4.6515646404 | -0.8188664927 | -0.9382649214 |
| H | 5.4704537615 | -0.2121602727 | -0.5684888338 |
| H | 5.0674640237 | -1.4664462039 | -1.7003214331 |
| H | 3.2780839329 | 3.8099412724  | 1.2396365284  |
| H | 3.9538050169 | 5.3754650245  | -0.5538106642 |
| H | 4.2460868318 | 2.0836808183  | -3.2378815414 |
| H | 4.4361535022 | 4.4844326308  | -2.8108365874 |
| H | 2.8593893293 | -1.3847747764 | 3.3108072968  |
| H | 2.6285485671 | -3.8353981388 | 3.0344626606  |
| H | 4.3231013354 | -3.5191113545 | -0.8652687316 |
| H | 3.3936674281 | -4.9015898699 | 0.9504527225  |
| H | 3.6238693978 | -0.0035810553 | -2.6577042287 |
| H | 2.5849340229 | -0.2572631804 | -1.2959582954 |

**S<sub>0</sub>/S<sub>1</sub> CI-trans-4 CASSCF(6,5)**

|   |              |              |               |
|---|--------------|--------------|---------------|
| N | 3.0611341420 | 1.2270836942 | 1.0805697490  |
| N | 3.7751736544 | 0.3113092675 | 1.7604595302  |
| C | 3.4500729881 | 2.0569600244 | -0.0080621992 |
| C | 3.5249173728 | 3.4036594142 | 0.2543577656  |
| C | 3.6849859225 | 1.5629946509 | -1.3143067731 |

|   |              |               |               |
|---|--------------|---------------|---------------|
| C | 3.8725014651 | 4.3095564280  | -0.7567202500 |
| C | 4.0213469581 | 2.4767965592  | -2.3003985017 |
| C | 4.1220075364 | 3.8508963126  | -2.0236785425 |
| C | 3.6455243450 | -1.0825361878 | 1.4189044634  |
| C | 3.1572621512 | -1.8878608768 | 2.4391696872  |
| C | 4.0549727360 | -1.6338531576 | 0.2060257341  |
| C | 3.0256682982 | -3.2533487594 | 2.2529623873  |
| C | 3.9331546688 | -3.0119962828 | 0.0450524907  |
| C | 3.4161818957 | -3.8171388169 | 1.0480518069  |
| C | 3.5694956493 | 0.0922999459  | -1.6303174749 |
| C | 4.6275769221 | -0.7876229943 | -0.9059842770 |
| H | 5.4200662914 | -0.1556409375 | -0.5198425045 |
| H | 5.0926220765 | -1.4470090947 | -1.6281811699 |
| H | 3.3118380177 | 3.7475109086  | 1.2463644228  |
| H | 3.9365072445 | 5.3560209958  | -0.5302253114 |
| H | 4.2071716084 | 2.1260867525  | -3.2980213662 |
| H | 4.3891259315 | 4.5322347830  | -2.8082495132 |
| H | 2.8891195528 | -1.4283347080 | 3.3695581713  |
| H | 2.6363160249 | -3.8679298413 | 3.0408893202  |
| H | 4.2527974985 | -3.4572626831 | -0.8782523206 |
| H | 3.3312833768 | -4.8754785023 | 0.8932699217  |
| H | 3.6736651195 | -0.0353635518 | -2.7007263292 |
| H | 2.5758324562 | -0.2596911120 | -1.3755901131 |

#### **S<sub>0</sub>/S<sub>1</sub> CI-cis-1 CASSCF(6,5)**

|   |               |               |               |
|---|---------------|---------------|---------------|
| N | -1.1471995296 | 1.1669741795  | -0.4983953366 |
| N | -1.4779483753 | 0.5072082284  | 0.6034698691  |
| C | -0.5876792262 | 0.4149441624  | -1.5710816886 |
| C | -0.3264641605 | 1.1847225774  | -2.7009941256 |
| C | -0.2827724540 | -0.9522252752 | -1.5479929241 |
| C | 0.2518631736  | 0.6259628104  | -3.8242907477 |
| C | 0.2937123616  | -1.4936269655 | -2.6967972134 |
| C | 0.5638552608  | -0.7252753842 | -3.8180774151 |
| C | -0.6900861669 | 0.3342277477  | 1.7698395950  |
| C | -0.8816650218 | 1.2443474827  | 2.8326482817  |
| C | 0.2049132269  | -0.7049168438 | 1.8737663121  |
| C | -0.1510607625 | 1.1174444998  | 3.9918629097  |
| C | 0.9437817667  | -0.8141876454 | 3.0753146878  |
| C | 0.7808951793  | 0.0676128903  | 4.1072671684  |
| C | -0.5373616698 | -1.8799282183 | -0.3721894557 |
| C | 0.4584059588  | -1.7530882427 | 0.8032341533  |
| H | 1.4558786037  | -1.6051883532 | 0.3980660778  |
| H | 0.4827852181  | -2.7139669965 | 1.3087673525  |
| H | -0.5886957734 | 2.2231585679  | -2.6670529768 |
| H | 0.4501986528  | 1.2291058088  | -4.6883329530 |
| H | 0.5309989712  | -2.5404941480 | -2.7109598162 |
| H | 1.0084463369  | -1.1816722736 | -4.6813948151 |
| H | -1.6027992464 | 2.0271757932  | 2.7087013831  |
| H | -0.2910980427 | 1.8084565969  | 4.7999557690  |
| H | 1.6486680816  | -1.6194886720 | 3.1700727326  |
| H | 1.3555829780  | -0.0427694644 | 5.0065781245  |
| H | -0.4432063159 | -2.8924328672 | -0.7481589253 |
| H | -1.5522977490 | -1.7801424687 | -0.0139614306 |

#### **S<sub>0</sub>/S<sub>1</sub> CI-cis-2 CASSCF(6,5)**



|   |               |               |               |
|---|---------------|---------------|---------------|
| N | 0.0000418259  | -0.0012052824 | -0.0005049798 |
| N | 0.0001117017  | -0.0007322498 | 1.3257213120  |
| C | 1.2641971220  | -0.0003175409 | -0.6570939334 |
| C | 1.1604204998  | 0.0568731531  | -2.0439771946 |
| C | 2.5166718135  | -0.0746757574 | -0.0337543100 |
| C | 2.2868372102  | 0.0290231004  | -2.8433190679 |
| C | 3.6382863120  | -0.0946319399 | -0.8625000608 |
| C | 3.5349813660  | -0.0479558952 | -2.2437046514 |
| C | -0.0922588720 | -1.1252047317 | 2.1847884020  |
| C | -1.3719728059 | -1.4832499813 | 2.6631953502  |
| C | 1.0311632991  | -1.8214282667 | 2.5648460442  |
| C | -1.5184718814 | -2.5598570489 | 3.5079550912  |
| C | 0.8546941346  | -2.9238739471 | 3.4337183189  |
| C | -0.3789056050 | -3.2924996684 | 3.8936053548  |
| C | 2.7380958095  | -0.1302277903 | 1.4682161441  |
| C | 2.4513119208  | -1.4957233846 | 2.1334303373  |
| H | 2.8062770566  | -2.2836353353 | 1.4744681241  |
| H | 3.0681807791  | -1.5542369199 | 3.0253364976  |
| H | 0.1780703558  | 0.1221489054  | -2.4671098433 |
| H | 2.1947065358  | 0.0719159857  | -3.9107236784 |
| H | 4.6117899118  | -0.1439711735 | -0.4126293800 |
| H | 4.4237928883  | -0.0651973424 | -2.8446355974 |
| H | -2.2140275870 | -0.8990520799 | 2.3503145058  |
| H | -2.4888320912 | -2.8369966044 | 3.8710387189  |
| H | 1.7231239459  | -3.4788757138 | 3.7372980422  |
| H | -0.4797248077 | -4.1331484107 | 4.5526638871  |
| H | 3.7883123257  | 0.0800842442  | 1.6360636139  |
| H | 2.1860559961  | 0.6523126556  | 1.9694193227  |

**S<sub>0</sub>/S<sub>1</sub> CI-trans-1 CASSCF(10,8)**

|   |              |               |               |
|---|--------------|---------------|---------------|
| N | 3.5645928786 | 1.3756871467  | 1.1451398506  |
| N | 2.9249769896 | 0.2518195185  | 1.2544047940  |
| C | 3.6992965144 | 2.0728038049  | -0.0637157007 |
| C | 4.0096618889 | 3.4382201061  | 0.0892603123  |
| C | 3.5760364514 | 1.5135789872  | -1.3540460904 |
| C | 4.1654220528 | 4.2532084093  | -1.0006720346 |
| C | 3.7395013607 | 2.3703819225  | -2.4508562560 |
| C | 4.0229924192 | 3.7250242914  | -2.2877035921 |
| C | 3.2900804342 | -1.1074581533 | 1.2699061944  |
| C | 2.8422610227 | -1.8773418080 | 2.3368331059  |
| C | 4.0181431430 | -1.6834676385 | 0.2253363125  |
| C | 3.1364106364 | -3.2287613810 | 2.3930376468  |
| C | 4.3064096084 | -3.0418486708 | 0.3054873708  |
| C | 3.8772777939 | -3.8118466629 | 1.3761546268  |
| C | 3.3541063719 | 0.0342210730  | -1.5839734279 |
| C | 4.4639058690 | -0.8667920094 | -0.9653951991 |
| H | 5.3117878353 | -0.2479219779 | -0.6877300612 |
| H | 4.8290311969 | -1.5491291937 | -1.7230252575 |
| H | 4.1059836975 | 3.8155351349  | 1.0876376138  |
| H | 4.3927384731 | 5.2930085959  | -0.8673981158 |
| H | 3.6539571648 | 1.9652821993  | -3.4416737693 |
| H | 4.1399900990 | 4.3556550316  | -3.1475792640 |
| H | 2.2741253895 | -1.3998944266 | 3.1093752414  |

|   |              |               |               |
|---|--------------|---------------|---------------|
| H | 2.7927594495 | -3.8172588172 | 3.2211381949  |
| H | 4.8650918525 | -3.5027083771 | -0.4872668412 |
| H | 4.1120614860 | -4.8581392746 | 1.4098150290  |
| H | 3.3277201052 | -0.1352472097 | -2.6533748652 |
| H | 2.3850251426 | -0.2669439205 | -1.2055918143 |

**S<sub>0</sub>/S<sub>1</sub> CI-trans-2 CASSCF(10,8)**

|   |              |               |               |
|---|--------------|---------------|---------------|
| N | 3.6416083774 | 1.2585649844  | 1.0290589954  |
| N | 2.8878600971 | 0.2654280745  | 1.3853491383  |
| C | 3.7436909505 | 2.0459874698  | -0.1019327050 |
| C | 4.0738416453 | 3.3997508916  | 0.0707520537  |
| C | 3.5792926857 | 1.5176161600  | -1.4014370583 |
| C | 4.1940898385 | 4.2298683075  | -1.0221476298 |
| C | 3.6960454533 | 2.3804057661  | -2.4775286425 |
| C | 3.9929990871 | 3.7274014455  | -2.3036391127 |
| C | 3.2941277647 | -1.0870644225 | 1.3149620347  |
| C | 2.8187624421 | -1.9045455412 | 2.3489338466  |
| C | 4.0432662811 | -1.6411334507 | 0.2592247256  |
| C | 3.1211049087 | -3.2480423877 | 2.3781096367  |
| C | 4.3238044339 | -3.0006908366 | 0.3112944358  |
| C | 3.8853067719 | -3.8009061151 | 1.3563197108  |
| C | 3.3687076808 | 0.0355423795  | -1.5921796017 |
| C | 4.4919499822 | -0.8238603302 | -0.9327270676 |
| H | 5.3150591682 | -0.1772326144 | -0.6489912781 |
| H | 4.8894154880 | -1.5070230031 | -1.6728148114 |
| H | 4.2109010670 | 3.7677635120  | 1.0676783482  |
| H | 4.4359587610 | 5.2653758702  | -0.8809924620 |
| H | 3.5723138323 | 1.9917603522  | -3.4710632394 |
| H | 4.0789397518 | 4.3714228997  | -3.1570410988 |
| H | 2.2256368483 | -1.4502893211 | 3.1173138230  |
| H | 2.7648628128 | -3.8621816077 | 3.1819443058  |
| H | 4.8872206095 | -3.4437579151 | -0.4882563655 |
| H | 4.1242097356 | -4.8467261556 | 1.3647603404  |
| H | 3.3389068464 | -0.1740352428 | -2.6540258049 |
| H | 2.4029460512 | -0.2646277506 | -1.1989543675 |

**S<sub>0</sub>/S<sub>1</sub> CI-trans-3 CASSCF(10,8)**

|   |              |               |               |
|---|--------------|---------------|---------------|
| N | 3.2473154109 | 1.3393476071  | 1.2355832444  |
| N | 3.9200931771 | 0.2717563457  | 1.5660918321  |
| C | 3.5321232855 | 2.1004256486  | 0.0708791306  |
| C | 3.5049975406 | 3.4890787269  | 0.2722410662  |
| C | 3.7816708430 | 1.5715047694  | -1.2114118909 |
| C | 3.7799188617 | 4.3628438154  | -0.7707786350 |
| C | 4.0533340662 | 2.4815170287  | -2.2396156282 |
| C | 4.0672914588 | 3.8451992466  | -2.0349085329 |
| C | 3.6973254888 | -1.1138213120 | 1.3641366265  |
| C | 3.1409822233 | -1.8634640005 | 2.3898323153  |
| C | 4.1199083845 | -1.7116689866 | 0.1781828884  |
| C | 2.9765328148 | -3.2307775208 | 2.2325030255  |
| C | 3.9545772426 | -3.0851712075 | 0.0421416374  |
| C | 3.3857399973 | -3.8419277573 | 1.0570365054  |
| C | 3.6588410301 | 0.1000953782  | -1.5552097713 |
| C | 4.7058834071 | -0.8620650761 | -0.9215033805 |
| H | 5.5451475364 | -0.2910499673 | -0.5411706055 |
| H | 5.0970350878 | -1.5134499924 | -1.6934819762 |

|   |              |               |               |
|---|--------------|---------------|---------------|
| H | 3.2783726141 | 3.8496119325  | 1.2554586140  |
| H | 3.7702154449 | 5.4222780179  | -0.6045553385 |
| H | 4.2430909598 | 2.0984875736  | -3.2247106618 |
| H | 4.2832011713 | 4.5060743159  | -2.8521828677 |
| H | 2.8500497820 | -1.3708688172 | 3.2958996181  |
| H | 2.5408374955 | -3.8111597363 | 3.0221433747  |
| H | 4.2744503297 | -3.5648258388 | -0.8636236429 |
| H | 3.2680103388 | -4.9009216475 | 0.9312571091  |
| H | 3.7238114907 | 0.0155528584  | -2.6329167874 |
| H | 2.6641030664 | -0.2432023136 | -1.2907258288 |

**S<sub>0</sub>/S<sub>1</sub> CI-trans-4 CASSCF(10,8)**

|   |              |               |               |
|---|--------------|---------------|---------------|
| N | 2.8225934403 | 1.1721405865  | 0.8768758414  |
| N | 3.3577388131 | 0.3172512069  | 1.7042256511  |
| C | 3.3678972346 | 2.0596636700  | -0.0849928959 |
| C | 3.5452596330 | 3.3930821042  | 0.2528483172  |
| C | 3.6318523996 | 1.5985478885  | -1.3734609163 |
| C | 4.0159423959 | 4.2871990078  | -0.6960172479 |
| C | 4.0951668923 | 2.5116811548  | -2.3136166060 |
| C | 4.2894477487 | 3.8451662726  | -1.9815068147 |
| C | 3.4769032939 | -1.0674281131 | 1.4120081335  |
| C | 3.1494660870 | -1.9104802566 | 2.4851623852  |
| C | 3.9216454888 | -1.6103208058 | 0.1898240382  |
| C | 3.2015492263 | -3.2905541979 | 2.3448000054  |
| C | 3.9630670500 | -3.0054144129 | 0.0841651499  |
| C | 3.6028359002 | -3.8362021363 | 1.1242213488  |
| C | 3.4421879801 | 0.1384506950  | -1.7002169509 |
| C | 4.4586771458 | -0.7770891439 | -0.9571625615 |
| H | 5.2800251955 | -0.1665220215 | -0.5967305701 |
| H | 4.8923518702 | -1.4614452306 | -1.6757863157 |
| H | 3.3088997862 | 3.7139008441  | 1.2475567094  |
| H | 4.1595215722 | 5.3174479145  | -0.4349082053 |
| H | 4.3035111375 | 2.1764250768  | -3.3121108609 |
| H | 4.6471151571 | 4.5332000261  | -2.7230029844 |
| H | 2.8475581645 | -1.4556579489 | 3.4071377566  |
| H | 2.9357988896 | -3.9272676146 | 3.1658115701  |
| H | 4.3016678587 | -3.4386327054 | -0.8382232485 |
| H | 3.6470078911 | -4.9007938066 | 0.9976856060  |
| H | 3.5623803684 | 0.0025666763  | -2.7680520855 |
| H | 2.4302532840 | -0.1665724996 | -1.4594554447 |

**S<sub>0</sub>/S<sub>1</sub> CI-cis-1 CASSCF(10,8)**

|   |               |               |               |
|---|---------------|---------------|---------------|
| N | -1.1283508190 | 1.1745799576  | -0.5019080730 |
| N | -1.4656279366 | 0.5204199004  | 0.6010668630  |
| C | -0.5834869478 | 0.4252970529  | -1.5737261767 |
| C | -0.3289186002 | 1.1833954460  | -2.6996253015 |
| C | -0.2772238273 | -0.9581393025 | -1.5495048624 |
| C | 0.2447863621  | 0.6176617945  | -3.8348739760 |
| C | 0.2905219417  | -1.4998390352 | -2.7025678167 |
| C | 0.5537947106  | -0.7245223959 | -3.8330128875 |
| C | -0.6839346576 | 0.3391145857  | 1.7696963074  |
| C | -0.8793011685 | 1.2465683946  | 2.8346236509  |
| C | 0.2087894657  | -0.7016973299 | 1.8761858578  |
| C | -0.1577776476 | 1.1140319377  | 3.9990842534  |
| C | 0.9374741022  | -0.8173931815 | 3.0833116771  |
| C | 0.7701278560  | 0.0609918700  | 4.1174946018  |

|   |               |               |               |
|---|---------------|---------------|---------------|
| C | -0.5299523739 | -1.8797639361 | -0.3681522734 |
| C | 0.4671374960  | -1.7477044180 | 0.8048231307  |
| H | 1.4631385764  | -1.5933960949 | 0.3978611609  |
| H | 0.4993503611  | -2.7081622978 | 1.3106252908  |
| H | -0.5864978175 | 2.2232327768  | -2.6707929326 |
| H | 0.4373352723  | 1.2241209769  | -4.6979560074 |
| H | 0.5290282264  | -2.5465217160 | -2.7210148725 |
| H | 0.9919889270  | -1.1819808959 | -4.6992262692 |
| H | -1.5965882050 | 2.0324537340  | 2.7075941848  |
| H | -0.3011221414 | 1.8033037455  | 4.8082011872  |
| H | 1.6383613007  | -1.6258749315 | 3.1806087738  |
| H | 1.3381601841  | -0.0542934409 | 5.0204185697  |
| H | -0.4368167716 | -2.8941004446 | -0.7401781863 |
| H | -1.5447445922 | -1.7798452254 | -0.0091912814 |

**S<sub>0</sub>/S<sub>1</sub> CI-cis-2 CASSCF(10,8)**

|   |               |               |               |
|---|---------------|---------------|---------------|
| N | 0.0077986387  | -0.0073126396 | -0.0136088992 |
| N | -0.0037446729 | -0.0308354592 | 1.3059610362  |
| C | 1.2478400672  | 0.0007767922  | -0.6657059365 |
| C | 1.1522535838  | 0.0831654835  | -2.0586042144 |
| C | 2.5239594172  | -0.0939345857 | -0.0412100283 |
| C | 2.2896656259  | 0.0566233593  | -2.8583753949 |
| C | 3.6278378001  | -0.1107922782 | -0.8662734928 |
| C | 3.5257429115  | -0.0417502525 | -2.2626232025 |
| C | -0.1014183222 | -1.1323114627 | 2.1860901022  |
| C | -1.3805931530 | -1.4675759047 | 2.6833581963  |
| C | 1.0170661547  | -1.8374951997 | 2.5661381139  |
| C | -1.5318782749 | -2.5298308731 | 3.5453416322  |
| C | 0.8357888909  | -2.9260307795 | 3.4511609107  |
| C | -0.3977805435 | -3.2721852701 | 3.9286506836  |
| C | 2.7412949242  | -0.1671555108 | 1.4601894810  |
| C | 2.4364864809  | -1.5332050378 | 2.1179365764  |
| H | 2.7718065770  | -2.3218788964 | 1.4496289469  |
| H | 3.0623221592  | -1.6082203362 | 3.0023358200  |
| H | 0.1727984872  | 0.1656302075  | -2.4851256485 |
| H | 2.1983008593  | 0.1168113879  | -3.9252603088 |
| H | 4.6046842280  | -0.1756755272 | -0.4249113855 |
| H | 4.4177916787  | -0.0605857212 | -2.8583328139 |
| H | -2.2182113785 | -0.8777132312 | 2.3693099981  |
| H | -2.5016761644 | -2.7893452416 | 3.9227299827  |
| H | 1.6999690461  | -3.4882358540 | 3.7535888907  |
| H | -0.5026166258 | -4.1026965508 | 4.5998756421  |
| H | 3.7944061343  | 0.0270945060  | 1.6304850570  |
| H | 2.1997952403  | 0.6195360260  | 1.9671748951  |

**TS-S<sub>0</sub> CASSCF(6,5)**

|   |               |               |               |
|---|---------------|---------------|---------------|
| N | 0.4650246593  | -1.2183433487 | -0.0176580588 |
| N | -0.6728479239 | -1.6152994950 | 0.3236749146  |
| C | 1.7298908717  | -0.6807065251 | -0.0460593574 |
| C | 2.8340492577  | -1.4179653033 | -0.4585194472 |
| C | 1.8566971425  | 0.6562932881  | 0.3506410926  |
| C | 4.0833570342  | -0.8186964589 | -0.4766945878 |
| C | 3.1250010938  | 1.2181473408  | 0.3721286474  |
| C | 4.2330909219  | 0.4916400216  | -0.0452877248 |
| C | -1.8005548523 | -0.7321542769 | 0.0669891358  |
| C | -3.0123747345 | -1.3498560129 | 0.2379083367  |

|   |               |               |               |
|---|---------------|---------------|---------------|
| C | -1.7233027183 | 0.6489996043  | -0.2576686332 |
| C | -4.2129143256 | -0.6457682909 | 0.0810402590  |
| C | -2.9269493806 | 1.3274617080  | -0.3945063913 |
| C | -4.1675705393 | 0.6868321858  | -0.2322356274 |
| C | 0.6012866787  | 1.4225534290  | 0.6870948230  |
| C | -0.4311422313 | 1.4153346938  | -0.4855858065 |
| H | 0.0564615184  | 1.0445493656  | -1.3785669004 |
| H | -0.7051849614 | 2.4418363141  | -0.6983809820 |
| H | 2.7022198895  | -2.4407290205 | -0.7488163197 |
| H | 4.9372294907  | -1.3795223726 | -0.8036634952 |
| H | 3.2445964032  | 2.2373103627  | 0.6883640707  |
| H | 5.2039787953  | 0.9479257993  | -0.0392326899 |
| H | -3.0133976543 | -2.3897498019 | 0.4988269269  |
| H | -5.1507092459 | -1.1493741766 | 0.2115838222  |
| H | -2.9110410525 | 2.3737655893  | -0.6352092870 |
| H | -5.0726710085 | 1.2506262209  | -0.3528502850 |
| H | 0.8668612498  | 2.4463372134  | 0.9216030783  |
| H | 0.1383946221  | 1.0181289466  | 1.5819324865  |

### TS-S<sub>0</sub> CASSCF(10,8)

|   |               |               |               |
|---|---------------|---------------|---------------|
| N | 0.4661200831  | -1.2333566387 | 0.0214969663  |
| N | -0.6743923503 | -1.5986255096 | 0.3865895513  |
| C | 1.7285912553  | -0.6995945868 | -0.0239965769 |
| C | 2.8177579603  | -1.4199439578 | -0.4574475792 |
| C | 1.8590155151  | 0.6564880448  | 0.3783012030  |
| C | 4.0764213640  | -0.8047880039 | -0.5068466988 |
| C | 3.1191481627  | 1.2234383771  | 0.3667393134  |
| C | 4.2334047799  | 0.4918159886  | -0.0853611866 |
| C | -1.7980264892 | -0.7247669861 | 0.0935923674  |
| C | -3.0115645399 | -1.3434619868 | 0.2495450089  |
| C | -1.7178118226 | 0.6521585803  | -0.2473750794 |
| C | -4.2103922906 | -0.6458264120 | 0.0560086297  |
| C | -2.9201774259 | 1.3248410590  | -0.4191762468 |
| C | -4.1619774044 | 0.6822918295  | -0.2755168054 |
| C | 0.5991669180  | 1.4118881725  | 0.7247047930  |
| C | -0.4229362520 | 1.4196596763  | -0.4554439530 |
| H | 0.0709628845  | 1.0559749696  | -1.3484007038 |
| H | -0.6937885610 | 2.4481359892  | -0.6622590934 |
| H | 2.6932068386  | -2.4441614839 | -0.7457047678 |
| H | 4.9206317405  | -1.3664956527 | -0.8571114334 |
| H | 3.2437128395  | 2.2461203228  | 0.6699595507  |
| H | 5.2003156577  | 0.9559192365  | -0.1061901591 |
| H | -3.0156881897 | -2.3790010994 | 0.5272794967  |
| H | -5.1492972136 | -1.1504152787 | 0.1738475964  |
| H | -2.9021219645 | 2.3682237165  | -0.6719081699 |
| H | -5.0659040252 | 1.2414700819  | -0.4232397667 |
| H | 0.8589627624  | 2.4324118170  | 0.9789812463  |
| H | 0.1341387473  | 0.9891767446  | 1.6097845070  |
